# Supplementary material for: The Case Experience of Integrating the SDGs into Corporate Strategies for Financial Risk Management Based on Social Responsibility (with the Example of Russian TNCs)
Source: MDPI journal article supplement (doi:10.3390/risks10010012), 2022-01-04
Supplement: s1 [file s1]

**Table S1.**

Sectors of companies of the sample.

| <b>Company</b>            | <b>Sector</b>              | <b>Industry</b>             |
|---------------------------|----------------------------|-----------------------------|
| Sberbank                  | Financials                 | Regional Banks              |
| Rosneft                   | Energy                     | Oil & Gas Operations        |
| Surgutneftegas            | Energy                     | Oil & Gas Operations        |
| Gazprom                   | Energy                     | Oil & Gas Operations        |
| Norilsk Nickel            | Materials                  | Diversified Metals & Mining |
| Lukoil                    | Energy                     | Oil & Gas Operations        |
| Transneft                 | Energy                     | Oil Services & Equipment    |
| Novatek                   | Energy                     | Oil & Gas Operations        |
| VTB Bank                  | Financials                 | Regional Banks              |
| Tatneft                   | Energy                     | Oil & Gas Operations        |
| Novolipetsk Steel         | Materials                  | Iron & Steel                |
| Severstal                 | Materials                  | Iron & Steel                |
| Rosseti                   | Utilities                  | Electric Utilities          |
| Polyus                    | Materials                  | Diversified Metals & Mining |
| Inter RAO                 | Utilities                  | Electric Utilities          |
| Magnit                    | Consumer Staples           | Food Retail                 |
| Moscow Exchange           | Financials                 | Investment Services         |
| Magnitogorsk Iron & Steel | Materials                  | Iron & Steel                |
| Credit Bank of Moscow     | Financials                 | Regional Banks              |
| Sistema                   | Telecommunication Services | Telecommunications services |

Source: authors' sample from the materials of Data World (2021).

**Figure S1.**

Screenshot of the official web site of Moscow Exchange

November 09 2021, 02:10 p.m.

Index “Responsibility and openness” (MRRT): basis for calculation (values of the leading countries that are included in the index)

МОСКОВСКАЯ БИРЖА

вторник, 09.11.2021 14:10

Поиск

Последние значения | Архив значений | База расчета | Технический анализ

**Ответственность и открытость** **MRRT** в рублях

Для получения данных в формате xml и csv необходимо пройти процедуру регистрации/авторизации на сайте и оформить подписку на ежедневные отчеты по индексам.

Архив цен и весов | Архив ребалансировок | Бюллетени

Получить данные

08.11.2021 Показать

| №  | Код инструмента | Цена, руб. | Общее количество ценных бумаг | Капитализация, руб.  | Free float, (FFI) | Коэффициент, ограничивающий вес (Wt) | Капитализация, учитываемая в индексе, руб. | Вес, % |
|----|-----------------|------------|-------------------------------|----------------------|-------------------|--------------------------------------|--------------------------------------------|--------|
| 1  | AFKS            | 28,32      | 9 650 000 000                 | 273 288 000 000      | 0,33              | 1                                    | 90 185 040 000                             | 0,6    |
| 2  | AFLT            | 69,1       | 2 444 535 448                 | 168 917 399 456,8    | 0,41              | 1                                    | 69 256 133 777,29                          | 0,46   |
| 3  | ALRS            | 132,75     | 7 364 965 630                 | 977 699 187 382,5    | 0,34              | 1                                    | 332 417 723 710,05                         | 2,21   |
| 4  | CHMF            | 1 664,2    | 837 718 660                   | 1 394 131 393 972    | 0,22              | 1                                    | 306 708 906 673,84                         | 2,04   |
| 5  | FEES            | 0,18144    | 1 274 665 323 063             | 231 275 276 216,55   | 0,18              | 1                                    | 41 629 549 718,98                          | 0,28   |
| 6  | GAZP            | 352,19     | 23 673 512 900                | 8 337 574 508 251    | 0,5               | 0,5818979                            | 2 425 808 548 722,4                        | 16,16  |
| 7  | GMKN            | 21 868     | 158 245 476                   | 3 460 512 069 168    | 0,38              | 1                                    | 1 314 994 586 283,84                       | 8,76   |
| 8  | HYDR            | 0,8201     | 439 288 905 849               | 360 260 831 686,76   | 0,25              | 1                                    | 90 065 207 921,69                          | 0,6    |
| 9  | IRAO            | 4,72       | 104 400 000 000               | 492 768 000 000      | 0,33              | 1                                    | 162 613 440 000                            | 1,08   |
| 10 | LKOH            | 7 244      | 692 865 762                   | 5 019 119 579 928    | 0,55              | 0,8831897                            | 2 438 059 093 833,41                       | 16,24  |
| 11 | LSRG            | 756,6      | 103 030 215                   | 77 952 660 669       | 0,42              | 1                                    | 32 740 117 480,98                          | 0,22   |
| 12 | MAGN            | 64,285     | 11 174 330 000                | 718 341 804 050      | 0,19              | 1                                    | 136 484 942 769,5                          | 0,91   |
| 13 | MGNT            | 6 920      | 101 911 355                   | 705 226 576 600      | 0,63              | 1                                    | 444 292 743 258                            | 2,96   |
| 14 | MOEX            | 172,86     | 2 276 401 458                 | 393 498 756 029,88   | 0,63              | 1                                    | 247 904 216 298,82                         | 1,65   |
| 15 | MTSS            | 313,15     | 1 998 381 575                 | 625 793 190 211,25   | 0,42              | 1                                    | 262 833 139 888,73                         | 1,75   |
| 16 | NLMK            | 222,56     | 5 993 227 240                 | 1 333 852 654 534,4  | 0,21              | 1                                    | 280 109 057 452,22                         | 1,87   |
| 17 | NVTK            | 1 802,2    | 3 036 306 000                 | 5 472 030 673 200    | 0,21              | 1                                    | 1 149 126 441 372                          | 7,66   |
| 18 | PHOR            | 5 845      | 129 500 000                   | 756 927 500 000      | 0,25              | 1                                    | 189 231 875 000                            | 1,26   |
| 19 | PLZL            | 14 925,5   | 136 069 400                   | 2 030 903 829 700    | 0,21              | 1                                    | 426 489 804 237                            | 2,84   |
| 20 | POGR            | 22,1       | 3 957 270 254                 | 87 455 672 613,4     | 0,65              | 1                                    | 56 846 187 198,71                          | 0,38   |
| 21 | POLY            | 1 347      | 473 585 104                   | 637 907 218 179      | 0,71              | 1                                    | 452 914 124 907,09                         | 3,02   |
| 22 | ROSN            | 634,9      | 10 598 177 817                | 6 728 783 096 013,3  | 0,11              | 1                                    | 740 166 140 561,46                         | 4,93   |
| 23 | RSTI            | 1,41       | 198 827 865 141               | 280 347 289 848,81   | 0,11              | 1                                    | 30 838 201 883,37                          | 0,21   |
| 24 | RTKM            | 93,19      | 3 282 997 929                 | 305 942 577 003,51   | 0,29              | 1                                    | 88 723 347 331,02                          | 0,59   |
| 25 | RUAL            | 69,085     | 15 193 014 862                | 1 049 609 431 741,27 | 0,17              | 1                                    | 178 433 603 396,02                         | 1,19   |
| 26 | SBER            | 359,07     | 21 586 948 000                | 7 751 225 418 360    | 0,48              | 0,6183691                            | 2 300 696 777 207,23                       | 15,33  |
| 27 | TATN            | 555,7      | 2 178 690 700                 | 1 210 698 421 990    | 0,32              | 1                                    | 387 423 495 036,8                          | 2,58   |
| 28 | TRNFP           | 151 250    | 1 554 875                     | 235 174 843 750      | 0,37              | 1                                    | 87 014 692 187,5                           | 0,58   |
| 29 | VTBR            | 0,05256    | 12 960 541 337 338            | 681 141 249 983,8    | 0,36              | 1                                    | 245 210 849 994,17                         | 1,63   |

Source: authors' screenshot from the official web site of Moscow Exchange 2021.
